# Supplementary material for: Preparation and Performance of Biodegradable Poly(butylene adipate-co-terephthalate) Composites Reinforced with Novel AgSnO2 Microparticles for Application in Food Packaging
Source: MDPI journal article supplement (doi:10.3390/polym15030554), 2023-01-21
Supplement: s1 [file s1]

## Supplementary data

**Figure S1.** EDS images of AgSnO<sub>2</sub> microparticles

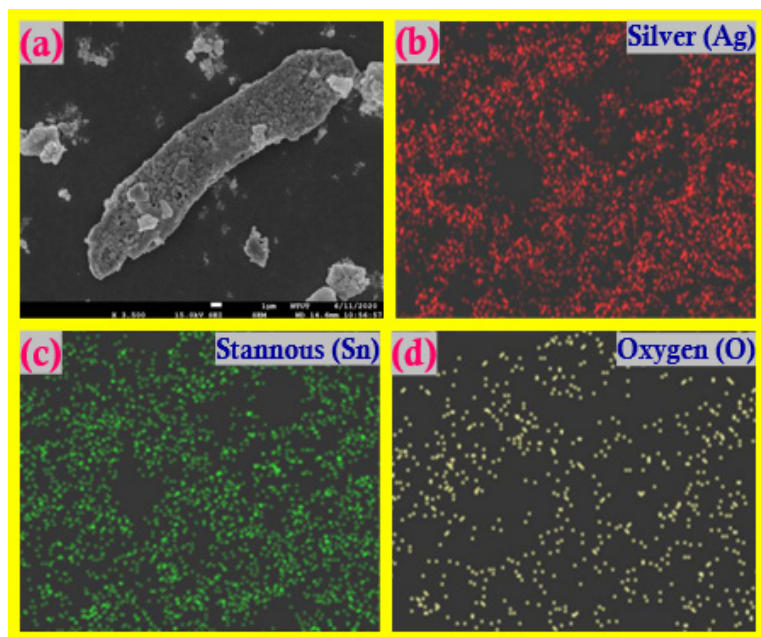

**Figure S2.** <sup>1</sup>H-NMR spectrum of PBAT

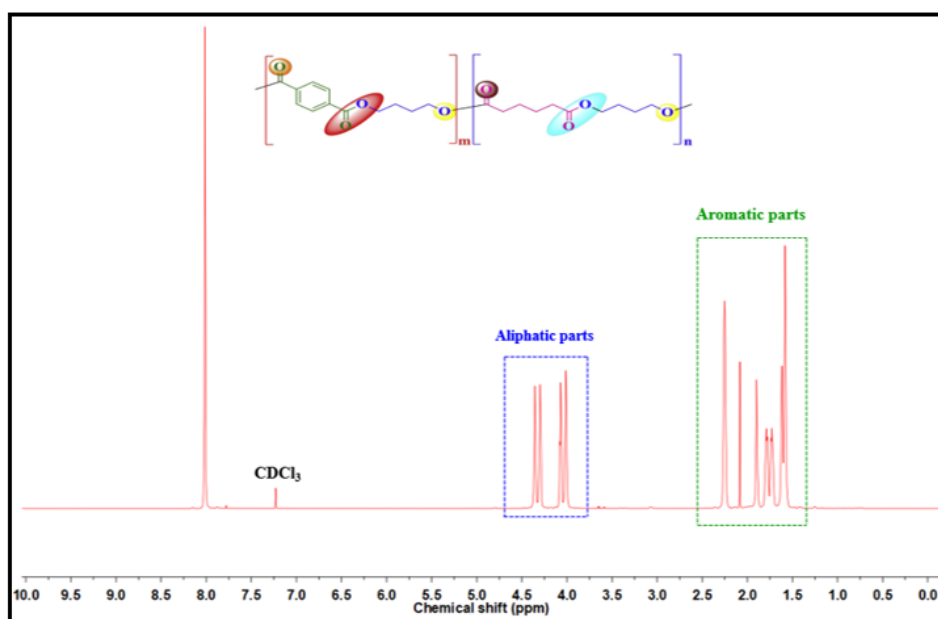

**Figure S3.** DSC curve of PBAT

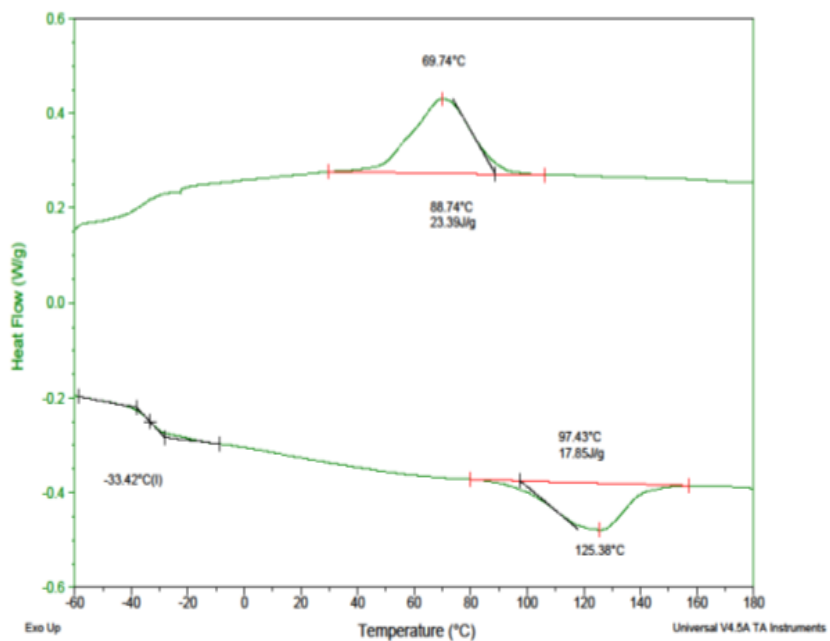

**Figure S4.** TGA curves (A); DSC curves (B), of PBAT and PBAT/AgSnO<sub>2</sub> composite films: (A) ACP-0.0, (B) ACP-0.5, (C) ACP-1.0, (D) ACP-2.0, (E) ACP-3.0, and (F) ACP-5.0.

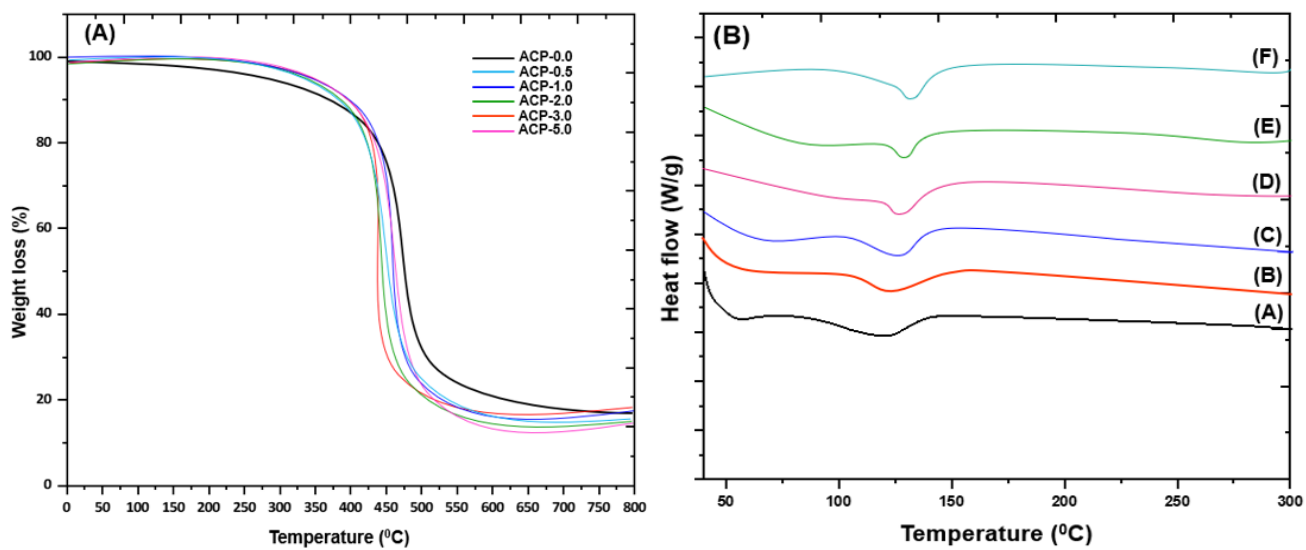

**Figure S5.** Images of PBAT film and PBAT/AgSnO<sub>2</sub> composites after burial in soil for 1, 2, 4 and 8 weeks

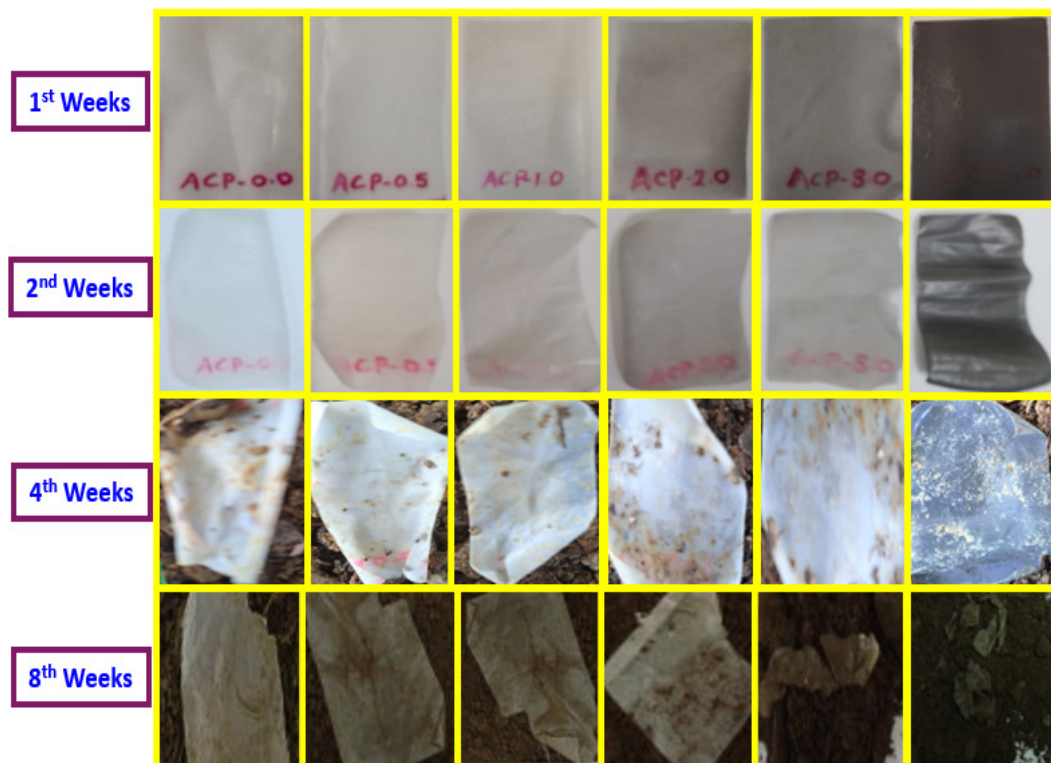

**Table S1.** Compositions of PBAT/AgSnO<sub>2</sub> prepared and their nomenclature

| S. No. | Nomenclature | PBAT (g) | AgSnO <sub>2</sub> microparticles (mg) |          |
|--------|--------------|----------|----------------------------------------|----------|
|        |              |          | Percentages of PBAT                    | MPs (mg) |
| 1.     | ACP-0.0      | 2.0      | 2.00                                   | 00.0     |
| 2.     | ACP-0.5      | 2.0      | 1.99                                   | 10.0     |
| 3.     | ACP-1.0      | 2.0      | 1.98                                   | 20.0     |
| 4.     | ACP-2.0      | 2.0      | 1.96                                   | 40.0     |
| 5.     | ACP-3.0      | 2.0      | 1.94                                   | 60.0     |
| 6.     | ACP-5.0      | 2.0      | 1.90                                   | 100.0    |

**Table S2.** Antimicrobial activity of PBAT/AgSnO<sub>2</sub> composites against *S. aureus* and *E. coli*

| Strain           | Zone of inhibition in (mm) |                          |                          |                          |                           |                           |
|------------------|----------------------------|--------------------------|--------------------------|--------------------------|---------------------------|---------------------------|
|                  | ACP-0.0                    | ACP-0.5                  | ACP-1.0                  | ACP-2.0                  | ACP-3.0                   | ACP-5.0                   |
| <i>S. aureus</i> | 8.00 ± 3.84 <sup>c</sup>   | 8.11 ± 3.84 <sup>b</sup> | 8.45 ± 2.35 <sup>b</sup> | 8.77 ± 1.85 <sup>c</sup> | 9.36 ± 2.63 <sup>a</sup>  | 14.20 ± 2.56 <sup>a</sup> |
| <i>E. coli</i>   | 8.00 ± 1.51 <sup>b</sup>   | 8.29 ± 2.25 <sup>a</sup> | 8.62 ± 2.78 <sup>c</sup> | 9.13 ± 3.01 <sup>c</sup> | 12.84 ± 3.40 <sup>b</sup> | 16.19 ± 4.05 <sup>c</sup> |

Results are quoted as the mean ± standard deviation of three replicates. a-c: Different letters within the same column indicate significant differences among film samples ( $p < 0.05$ ).
